# Supplementary material for: A Novel Method for the Pre-Column Derivatization of Saccharides from Polygonatum cyrtonema Hua. by Integrating Lambert–Beer Law and Response Surface Methodology
Source: MDPI journal article supplement (doi:10.3390/molecules28052186), 2023-02-26
Supplement: s1 [file s1]

# Supporting Information

## A Novel Method for the Pre-column Derivatization of Saccharides from *Polygonatum cyrtonema* Hua by Integrating Lambert-Beer Law and Response Surface Methodology

Hui Liu <sup>1,†</sup>, Yuanyuan Zhao <sup>1,†</sup>, Leijing Chen <sup>1</sup>, Jiao Du <sup>1</sup>, Hongyan Guo <sup>2,\*</sup> and Bin Wang <sup>1,3,\*</sup>

<sup>1</sup> Key Laboratory of Xin'an Medicine, Ministry of Education, Anhui University of Chinese Medicine, Hefei, Anhui, 230038, China

<sup>2</sup> Hefei Institutes of Physical Science, Chinese Academy of Sciences, Hefei, China

<sup>3</sup> Institute of pharmaceutical chemistry, Anhui Academy of Chinese Medicine, Hefei, Anhui, 230038, China

\* E-mail: hyguo@iim.ac.cn; bw5654@ahtcm.edu.cn

† These authors contributed equally to this work.

### Table of Contents:

|                                      |    |
|--------------------------------------|----|
| 1. General Remarks                   | S2 |
| 2. Box–Behnken experimental          | S3 |
| 3. UV absorbance of PMP derivatives  | S4 |
| 4. Characterization Data of Products | S5 |

## 1. General Remarks

All substrates were purchased commercially without further purification. The yields were determined based on sulfonyl hydrazides. GC-MS spectra were measured with Bruker GC-MS 456-Scion. All new compounds were characterized by  $^1\text{H}$  NMR,  $^{13}\text{C}$  NMR and HRMS.  $^1\text{H}$  and  $^{13}\text{C}$  NMR spectra were recorded on a Bruker AC-300 FT spectrometer at 400 MHz and 100 MHz, respectively, and tetramethylsilane (TMS) was used as an internal standard. Chemical shifts ( $\delta$ ) and coupling constants ( $J$ ) were expressed in ppm and Hz, respectively. All chemical shifts were reported relative to tetramethylsilane (0 ppm for  $^1\text{H}$ ),  $\text{CDCl}_3$  (7.26 ppm for  $^1\text{H}$ , 77.16 ppm for  $^{13}\text{C}$ ) and DMSO (2.50 ppm for  $^1\text{H}$ , 39.52 ppm for  $^{13}\text{C}$ ), respectively. High-resolution mass spectra (HRMS) were recorded on a Waters Xevo G2-XS QTOF spectrometer (Tolerance = 10.0 ppm). All reagents were obtained from commercial sources (purity >97%) and used without further purification except for special instructions. Silica gel for column chromatography was purchased from Qingdao Haiyang Chemical Co., Ltd.

## 2. Box–Behnken experimental

**Table S1** The yield optimization of CPMP- monosaccharide by Box–Behnken experimental design

| Run | A  | B  | C   | D   | Peak area |
|-----|----|----|-----|-----|-----------|
| 1   | 50 | 60 | 0.4 | 0.4 | 71.5      |
| 2   | 70 | 60 | 0.5 | 0.8 | 68        |
| 3   | 70 | 60 | 0.4 | 0.6 | 71.9      |
| 4   | 90 | 90 | 0.4 | 0.6 | 71        |
| 5   | 50 | 60 | 0.3 | 0.6 | 68.9      |
| 6   | 70 | 30 | 0.4 | 0.4 | 69.8      |
| 7   | 50 | 60 | 0.5 | 0.6 | 67.5      |
| 8   | 70 | 90 | 0.5 | 0.6 | 71.1      |
| 9   | 50 | 30 | 0.4 | 0.6 | 66.5      |
| 10  | 70 | 60 | 0.4 | 0.6 | 72.08     |
| 11  | 70 | 60 | 0.3 | 0.8 | 67.3      |
| 12  | 70 | 60 | 0.4 | 0.6 | 70.15     |
| 13  | 70 | 30 | 0.3 | 0.6 | 67.9      |
| 14  | 90 | 60 | 0.4 | 0.8 | 67.8      |
| 15  | 70 | 90 | 0.4 | 0.8 | 68        |
| 16  | 70 | 30 | 0.4 | 0.8 | 66.3      |
| 17  | 90 | 60 | 0.5 | 0.6 | 68.9      |
| 18  | 70 | 90 | 0.3 | 0.6 | 70.3      |
| 19  | 90 | 30 | 0.4 | 0.6 | 67.8      |
| 20  | 70 | 90 | 0.4 | 0.4 | 73        |
| 21  | 70 | 60 | 0.5 | 0.4 | 70.9      |
| 22  | 90 | 60 | 0.4 | 0.4 | 71.9      |
| 23  | 90 | 60 | 0.3 | 0.6 | 69.4      |
| 24  | 70 | 60 | 0.4 | 0.6 | 70.19     |
| 25  | 50 | 90 | 0.4 | 0.6 | 69.4      |
| 26  | 70 | 30 | 0.5 | 0.6 | 67.8      |
| 27  | 70 | 60 | 0.3 | 0.4 | 71.5      |
| 28  | 70 | 60 | 0.4 | 0.6 | 73.45     |
| 29  | 50 | 60 | 0.4 | 0.8 | 67.4      |

### 3. UV absorbance of PMP derivatives with different substituents

**Table S2** The molar absorption coefficient of PMP with different substituents in methanol solvent

| different substituents | weight (mg) | Maximum absorbance | Maximum absorption wavelength | C (mol/L) | $\epsilon$ (L/mol/cm) |
|------------------------|-------------|--------------------|-------------------------------|-----------|-----------------------|
| 4-CN                   | 5.32        | 0.39               | 287                           | 1.67E-05  | 23382.49              |
| 4-CH <sub>3</sub>      | 4.79        | 0.21               | 244                           | 1.59E-05  | 13293.05              |
| 4-F                    | 5.16        | 0.19               | 243                           | 1.68E-05  | 11113.26              |
| 4-Cl                   | 5.29        | 0.26               | 254                           | 1.59E-05  | 16411.64              |
| 4-Br                   | 6.14        | 0.27               | 255                           | 1.52E-05  | 17489.26              |
| 4-OCH <sub>3</sub>     | 5.42        | 0.23               | 246                           | 1.66E-05  | 13663.03              |
| 4-H                    | 6.46        | 0.27               | 244                           | 2.32E-05  | 11593.40              |
| 2-F                    | 7.539       | 0.24               | 234                           | 2.45E-05  | 9850.37               |
| 3-F                    | 19.55       | 0.18               | 246                           | 1.59E-05  | 11371.96              |

**Table S3** The molar absorption coefficient of PMP with different substituents in ethanol solvent

| different substituents | weight (mg) | Maximum absorbance | Maximum absorption wavelength | C (mol/L) | $\epsilon$ (L/mol/cm) |
|------------------------|-------------|--------------------|-------------------------------|-----------|-----------------------|
| 4-CN                   | 5.38        | 0.35               | 287                           | 1.69E-05  | 20852.47              |
| 4-CH <sub>3</sub>      | 6.63        | 0.30               | 244                           | 2.20E-05  | 13634.17              |
| 4-F                    | 5.09        | 0.23               | 243                           | 1.66E-05  | 13659.38              |
| 4-Cl                   | 4.9         | 0.26               | 254                           | 1.47E-05  | 17587.45              |
| 4-Br                   | 5.49        | 0.22               | 255                           | 1.36E-05  | 16003.25              |
| 4-OCH <sub>3</sub>     | 6.6         | 0.32               | 246                           | 2.02E-05  | 15953.65              |
| 4-H                    | 7.81        | 0.40               | 244                           | 2.80E-05  | 14219.19              |
| 2-F                    | 21.54       | 0.18               | 234                           | 1.75E-05  | 10301.37              |
| 3-F                    | 19.55       | 0.27               | 246                           | 1.59E-05  | 16803.28              |

**Table S4** The molar absorption coefficient of PMP with different substituents in acetonitrile solvent

| different substituents | weight (mg) | Maximum absorbance | Maximum absorption wavelength | C (mol/L) | $\epsilon$ (L/mol/cm) |
|------------------------|-------------|--------------------|-------------------------------|-----------|-----------------------|
| 4-CN                   | 4.58        | 0.28               | 287                           | 1.44E-05  | 19712.28              |
| 4-CH <sub>3</sub>      | 7.22        | 0.33               | 244                           | 2.40E-05  | 13941.38              |
| 4-F                    | 5.44        | 0.24               | 243                           | 1.77E-05  | 13376.55              |
| 4-Cl                   | 6.01        | 0.26               | 254                           | 1.81E-05  | 14254.44              |
| 4-Br                   | 5.31        | 0.19               | 255                           | 1.32E-05  | 14516.14              |
| 4-OCH <sub>3</sub>     | 5.01        | 0.25               | 246                           | 1.53E-05  | 16379.34              |
| 4-H                    | 6.59        | 0.32               | 244                           | 2.37E-05  | 13611.52              |
| 2-F                    | 21.54       | 0.19               | 234                           | 1.75E-05  | 10620.38              |
| 3-F                    | 19.55       | 0.26               | 246                           | 1.59E-05  | 16541.72              |

## 4. Characterization Data of Products

**1-(4-bromophenyl)-3-methyl-1H-pyrazol-5-ol.** White solid: 46% yield;  $^1\text{H}$  NMR (500 MHz, DMSO)  $\delta$  7.71 (d, 2H), 7.60 (d, 2H), 2.51 (s, 2H), 2.11 (s, 3H).

**3-methyl-1-(p-tolyl)-1H-pyrazol-5-ol.** White solid: 52% yield.  $^1\text{H}$  NMR (500 MHz, DMSO)  $\delta$  7.57 (d, 2H), 7.21 (d, 2H), 2.50 (s, 2H), 2.30 (s, 3H), 2.10 (s, 3H).

**1-(4-chlorophenyl)-3-methyl-1H-pyrazol-5-ol.** White solid: 37% yield;  $^1\text{H}$  NMR (500 MHz, DMSO)  $\delta$  7.76 (d, 2H), 7.47 (d, 2H), 2.51 (s, 2H), 2.12 (s, 3H).

**1-(4-methoxyphenyl)-3-methyl-1H-pyrazol-5-ol.** White solid: 41% yield;  $^1\text{H}$  NMR (500 MHz, DMSO)  $\delta$  7.57 (d, 2H), 6.98 (d, 2H), 3.76 (s, 3H), 2.51 (s, 1H), 2.10 (s, 3H).

**1-(4-fluorophenyl)-3-methyl-1H-pyrazol-5-ol.** White solid: 76% yield;  $^1\text{H}$  NMR (500 MHz,  $\text{CDCl}_3$ )  $\delta$  7.83 (d, 2H), 7.08 (d, 2H), 3.42 (s, 2H), 2.18 (s, 3H).  $^{13}\text{C}$  NMR (126 MHz,  $\text{CDCl}_3$ )  $\delta$  170.4, 160.8, 158.9, 134.2, 120.6, 115.5, 43.0, 17.0.

**1-(3-fluorophenyl)-3-methyl-1H-pyrazol-5-ol.** White solid: 27% yield;  $^1\text{H}$  NMR (500 MHz,  $\text{CDCl}_3$ )  $\delta$  7.69 (d, 2H), 7.33 (d, 1H), 6.86 (m, 1H), 3.42 (s, 2H), 2.18 (s, 3H).  $^{13}\text{C}$  NMR (126 MHz,  $\text{CDCl}_3$ )  $\delta$  170.6, 163.8, 161.9, 139.4, 130.1, 113.9, 111.5, 106.1, 43.2, 16.9.

**1-(2-fluorophenyl)-3-methyl-1H-pyrazol-5-ol.** White solid: 28% yield;  $^1\text{H}$  NMR (500 MHz,  $\text{CDCl}_3$ )  $\delta$  7.43 (d, 1H), 7.32 (s, 1H), 7.20 (m, 1H), 7.17 (s, 1H), 3.40 (s, 2H), 2.17 (s, 3H).  $^{13}\text{C}$  NMR (126 MHz,  $\text{CDCl}_3$ )  $\delta$  171.1, 156.9, 129.4, 127.1, 124.4, 116.9, 41.5, 17.1.
